# Supplementary material
Source: PubMed Central journal article supplement (PMC6557269)
Supplement: NIHMS1522476-supplement-8.pdf [file NIHMS1522476-supplement-8.pdf]

## Results

### *HVGGSSV binds to the PDZ domain of TIP1*

Energy-minimized TIP1 protein was docked with energy-minimized HVGGSSV peptide using Autodock Vina software [17]. The binding energy of HVGGSSV to TIP1 calculated by the software was -6.0 kCal/mol. We compared the binding energy of HVGGSSV to

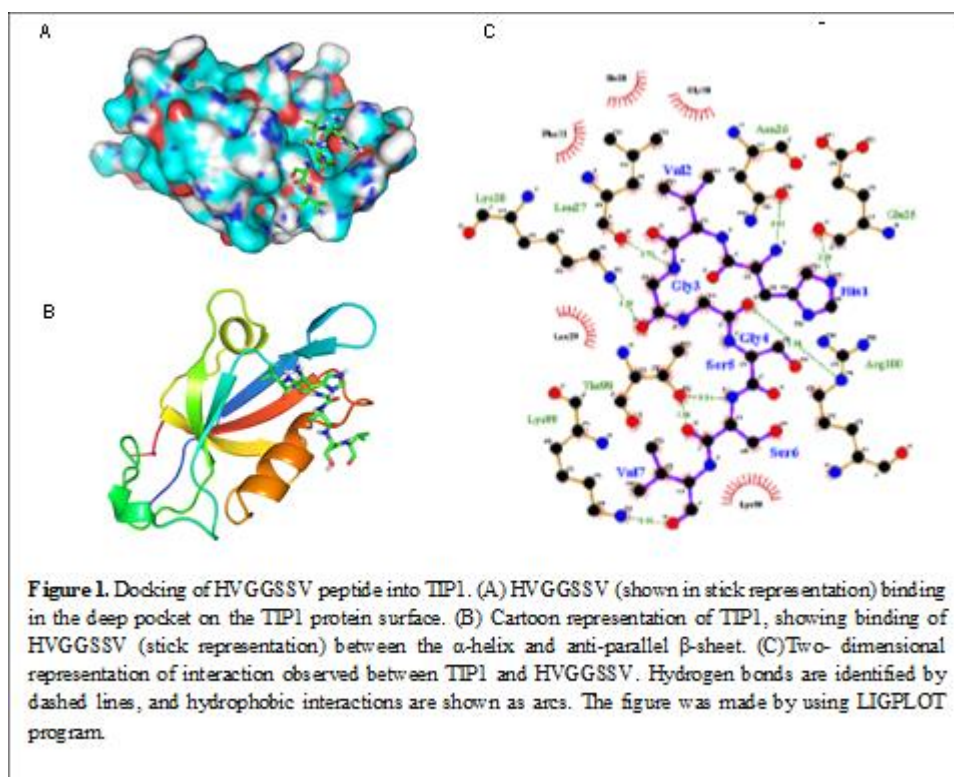

other potential peptides. We performed computational docking for the peptide sequences of iCAL36 (ANSRWPTSII), Kir2.3 (RRESI) and Glutaminase L (KENLESMV). The binding energies of these peptides to TIP1 were -6.1, -5.9 and -4.9 respectively (**Supplementary table**). **Fig 1A** shows HVGGSSV perfectly fitting in the major groove of the TIP1 protein surface. **Fig 1B** shows the peptide fits between the alpha helix and the anti-parallel beta sheets. **Fig 1C** shows the detailed interactions between the amino acids of the protein and the peptide. The

**Supplementary Table.** Binding energies of TIP1 binding peptides using computational docking

| TIP1 binding ligand | Ligand peptide sequence | Binding energy (kCal/mol) |
|---------------------|-------------------------|---------------------------|
| iCal                | ANSRWPTSII              | -6.1                      |
| Glutaminase L       | KENLESMV                | -4.9                      |
| Kir2.3              | RRESI                   | -5.9                      |

TIP1 residues involved in interacting with HVGGSSV are Lys 20, Glu 25, Asn 26, Leu 27, Ile 28, Leu 29,
